# Supplementary material for: Infliximab versus ciclosporin for steroid-resistant acute severe ulcerative colitis (CONSTRUCT): a mixed methods, open-label, pragmatic randomised trial
Source: Lancet Gastroenterol Hepatol. 2016 Sep;1(1):15–24. doi: 10.1016/S2468-1253(16)30003-6 (PMC4994668; doi:10.1016/S2468-1253(16)30003-6)
Supplement: Supplementary appendix [file mmc1.pdf]

# THE LANCET

## Gastroenterology & Hepatology

### **Supplementary appendix**

This appendix formed part of the original submission and has been peer reviewed.  
We post it as supplied by the authors.

Supplement to: Williams JG, Alam MF, Alrubaiy L, et al, for the CONSTRUCT investigators. Infliximab versus ciclosporin for steroid-resistant acute severe ulcerative colitis (CONSTRUCT): a mixed methods, open-label, pragmatic randomised trial. *Lancet Gastroenterol Hepatol* 2016; published online June 22. [http://dx.doi.org/10.1016/S2468-1253\(16\)30003-6](http://dx.doi.org/10.1016/S2468-1253(16)30003-6).

## Web Appendix

### Infliximab versus ciclosporin for steroid-resistant acute severe ulcerative colitis (CONSTRUCT): a mixed methods, open-label, pragmatic randomised trial

#### Method for measurement of quality adjusted survival

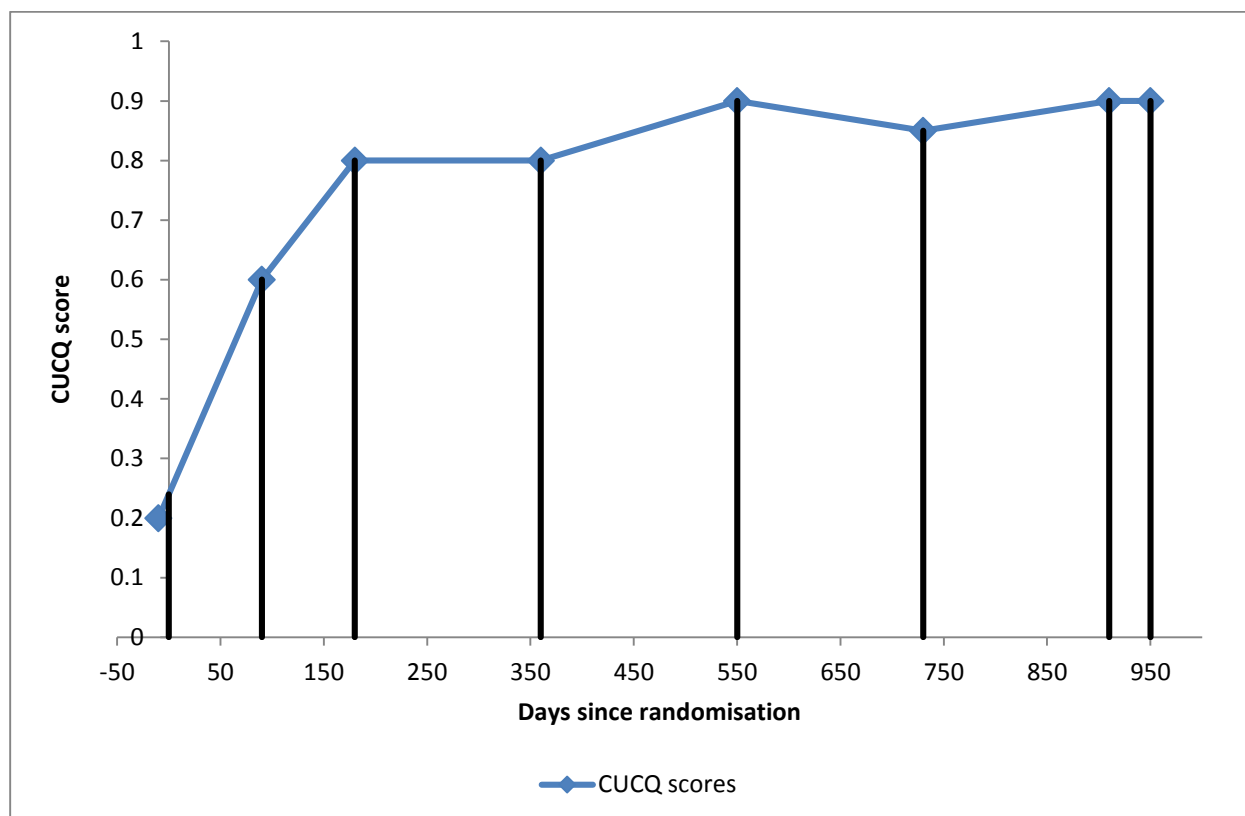

## Primary and safety outcomes, analysed by treatment allocated

| Outcome                                                                  | Raw data                  |                           | Adjusted comparison              | 95% CI             | Intra-cluster correlation |                   |
|--------------------------------------------------------------------------|---------------------------|---------------------------|----------------------------------|--------------------|---------------------------|-------------------|
|                                                                          | Infliximab                | Ciclosporin               |                                  |                    | Estimate                  | 95% CI            |
| QAS [note 1]:<br>Mean<br>(sd)<br>[n]                                     | 564.0<br>(241.9)<br>[121] | 587.0<br>(226.2)<br>[121] | $\Delta=7.90$<br>( $p=0.603$ )   | (-21.97,<br>37.77) | 0.065                     | (0.015,<br>0.147) |
| QAS per day [note 2]:<br>Mean<br>(sd)<br>[n]                             | 0.705<br>(0.181)<br>[121] | 0.733<br>(0.158)<br>[121] | $\Delta=0.030$<br>( $p=0.129$ )  | (-0.009,<br>0.068) | 0.094                     | (0.028,<br>0.189) |
| Participants subsequently<br>undergoing colectomy:<br>proportion (%)     | 55/135 (40.7%)            | 65/135 (48.1%)            | OR=1.350<br>( $p=0.223$ )        | (0.832,<br>2.188)  | 0                         | n/a               |
| Time to colectomy (days) [note 3]:<br>Mean<br>[n]                        | 810.8<br>[135]            | 744.1<br>[135]            | HR=1.234<br>( $p=0.251$ )        | (0.862,<br>1.768)  | 0                         | n/a               |
| Total number of SARs                                                     | 16                        | 10                        | ER=0.938<br>( $p=0.788$ )        | (0.590,<br>1.493)  | 0                         | n/a               |
| One SAR per participant                                                  | 12                        | 8                         |                                  |                    |                           |                   |
| Two SARs per participant                                                 | 2                         | 1                         |                                  |                    |                           |                   |
| Participants with one or more<br>SARs [note 4]: proportion (%)           | 14/135<br>(10.4%)         | 9/135 (6.7%)              | OR=0.660<br>( $p=0.338$ )        | (0.282,<br>1.546)  | 0.050                     | (0.008,<br>0.132) |
| Total number of SAEs                                                     | 21                        | 25                        | ER=1.075<br>( $p=0.807$ )        | (0.603,<br>1.917)  | 0                         | n/a               |
| One SAE per participant                                                  | 12                        | 13                        |                                  |                    |                           |                   |
| Two SAEs per participant                                                 | 3                         | 2                         |                                  |                    |                           |                   |
| Three SAEs per participant                                               | 1                         | 0                         |                                  |                    |                           |                   |
| Four SAEs per participant                                                | 0                         | 2                         |                                  |                    |                           |                   |
| Participants with one or more<br>SAEs [note 5]:<br>proportion (%)        | 16/135 (11.9%)            | 17/135 (12.6%)            | OR=0.999<br>( $p=0.998$ )        | (0.473,<br>2.114)  | 0                         | n/a               |
| Post-randomisation LOS (days)<br>[note 6]:<br>Mean<br>(sd)<br>[n]        | 10.32<br>(13.55)<br>[135] | 12.21<br>(10.18)<br>[135] | $\Delta=1.542$<br>( $p=0.286$ )  | (-1.297,<br>4.381) | 0.025                     | (0.002,<br>0.089) |
| Logarithm of Post-<br>randomisation LOS [note 7]:<br>Mean<br>(sd)<br>[n] | 1.878<br>(0.887)<br>[135] | 2.289<br>(0.626)<br>[135] | $\Delta=0.421$<br>( $p<0.0001$ ) | (0.245,<br>0.597)  | 0.024                     | (0.001,<br>0.085) |
| Mortality:<br>Proportion (%)                                             | 3/135 (2.2%)              | 0/135 (0%)                |                                  |                    |                           |                   |

ER, event ratio; HR, hazard ratio; LOS, length of stay; n/a, not applicable

Significant covariates and factors:

1. Days in follow-up ( $p<0.001$ ); CUCQ at baseline ( $p<0.001$ ); EQ-5D at baseline ( $p=0.015$ )
2. CUCQ at baseline ( $p<0.001$ ); weight ( $p=0.011$ )
3. Intracluster correlation assessed using time to event
4. Age at randomisation ( $p=0.006$ )
5. Age at randomisation ( $p=0.031$ ); symptoms duration ( $p=0.049$ )
6. Age at randomisation ( $p<0.001$ ); gender ( $p=0.034$ ); smoking ( $p=0.032$ )
7. Age at randomisation ( $p<0.001$ ); gender ( $p=0.013$ ); EQ-5D at baseline ( $p=0.007$ )

## Sites and Principal Investigators

| Trust/Health Board                                            | Principal Investigator              |
|---------------------------------------------------------------|-------------------------------------|
| Abertawe Bro Morgannwg Uni Health Board                       | Dr Linzi Thomas                     |
| Aneurin Bevan University Health Board                         | Dr Vivek Goel                       |
| Barking Havering and Redbridge University Hospitals NHS Trust | Dr Stephen Grainger                 |
| Barts Health NHS Trust                                        | Dr James Lindsay                    |
| Blackpool Teaching Hospitals NHS Foundation Trust             | Dr Peter Isaacs                     |
| Bradford Teaching Hospitals NHS Foundation Trust              | Dr Conrad Beckett                   |
| Brighton & Sussex University Hospitals NHS Trust              | Dr Alan Ireland                     |
| Cardiff & Vale University Health Board                        | Dr Barney Hawthorne                 |
| Chelsea & Westminster NHS Foundation Trust                    | Dr Alan Steel                       |
| Chesterfield Royal Hospital NHS Foundation Trust              | Dr David Elphick                    |
| City Hospitals Sunderland NHS Foundation Trust                | Dr David Hobday                     |
| Colchester Hospital University NHS Foundation Trust           | Dr Achuth Shenoy                    |
| Countess of Chester Hospital NHS Foundation Trust             | Dr Carol Francis                    |
| Derby Hospitals NHS Foundation Trust                          | Dr Andy Cole                        |
| Dorset County Hospitals NHS Foundation Trust                  | Dr Chris Hovell                     |
| Frimley Park Hospital NHS Foundation Trust                    | Dr Sarah Langlands                  |
| Gateshead Health NHS Foundation Trust                         | Dr Jamie Barbour                    |
| Gloucestershire Hospitals NHS Foundation Trust                | Dr Ian Shaw                         |
| Hampshire Hospitals NHS Foundation Trust                      | Dr John Gordon                      |
| Hull & East Yorkshire NHS Trust                               | Dr Shaji Sebastian                  |
| Leeds Teaching Hospitals NHS Trust                            | Dr Alex Ford                        |
| Lewisham & Greenwich NHS Trust                                | Dr John O'Donohue                   |
| Maidstone & Tunbridge Wells NHS Trust                         | Dr Bijay Baburajan                  |
| NHS Forth Valley                                              | Dr David Watts                      |
| NHS Highland                                                  | Dr Lindsay Potts                    |
| NHS Lothian                                                   | Dr Ian Arnott                       |
| North Cumbria University Hospitals NHS Trust                  | Dr Chris Macdonald                  |
| North Tees & Hartlepool NHS Foundation Trust                  | Dr Matt Rutter                      |
| Nottingham University Hospitals NHS Foundation Trust          | Dr Aida Jawhari                     |
| Oxford Radcliffe Hospitals NHS Trust                          | Professor Simon Travis              |
| Rotherham NHS Foundation Trust                                | Dr P Basumani                       |
| Royal Bournemouth & Christchurch Hosp NHS Foundation Trust    | Dr Sean Weaver                      |
| Royal Devon & Exeter Foundation Trust                         | Dr Tariq Ahmad                      |
| Royal Liverpool & Broadgreen University Hospitals NHS Trust   | Dr Keith Leiper* & Dr S Subramanian |
| Royal Shrewsbury & Telford NHS Trust                          | Dr Mark Smith                       |
| Royal Wolverhampton NHS Trust                                 | Dr Brian McKaig                     |
| Salford Royal NHS Foundation Trust                            | Dr Andrew Robinson                  |
| Sheffield Teaching Hospitals NHS Foundation Trust             | Dr Alan Lobo                        |
| South Devon Healthcare NHS Foundation Trust                   | Dr Cathryn Edwards                  |
| South Tees Hospitals NHS Foundation Trust                     | Dr Helen Dallal & Dr A Ramadas      |
| South Tyneside NHS Foundation Trust                           | Dr Faheem Butt                      |
| St George's University of London                              | Dr Richard Pollok                   |
| Taunton & Somerset NHS Foundation Trust                       | Dr Paul Thomas                      |
| The Newcastle upon Tyne Hospitals NHS Foundation Trust        | Dr John Mansfield                   |
| University College London Hospitals NHS Foundation Trust      | Dr Stuart Bloom                     |
| University Hospital South Manchester NHS Foundation Trust     | Dr Gill Watts                       |
| University Hospital Southampton NHS Trust                     | Dr Fraser Cummings                  |
| University Hospitals Bristol NHS Foundation Trust             | Dr Tom Creed                        |
| West Middlesex University Hospital NHS Trust                  | Dr Joel Mawdsley                    |
| Western Sussex Hospitals NHS Trust                            | Dr Andy Li                          |
| Weston Area Health NHS Trust                                  | Dr Alex di Mambro & Dr David Parker |
| Wrightington, Wigan and Leigh NHS Foundation Trust            | Dr Yeng Ang & Dr Neeraj Prasad      |
| * deceased                                                    |                                     |

## Views of Patients and Professionals

The following is a summary of the qualitative elements of the CONSTRUCT trial. They are reported in depth elsewhere.<sup>1</sup>

### Aim

The qualitative components of the CONSTRUCT trial used interviews to explore the views of participating patients, doctors and nurses about severe ulcerative colitis and its management. The aims were to clarify participants' feelings about their condition, their perceptions of treatment with infliximab, ciclosporin or surgery and to understand changes to these views over time. Interviews with doctors and nurses aimed to understand their views about the efficacy, safety and administration of the trial drugs, shared decision-making with patients, and their responses to their patients' ongoing illness experience.

### Method

Trial participants who indicated their willingness to be interviewed when giving consent were chosen according to a purposive quota sampling framework. This identified 12 consenting patients from each arm of the trial, who were interviewed twice, two to three, and 8-12 months after randomisation. All interviews followed a semi-structured format to ensure consistency of data collection whilst enabling patients to respond to prompts if they so wished, to ensure comprehensive and rich data capture. The first interviews investigated patients' priorities for their health and well-being, and the administration, side effects and response to the treatment they received. The second interviews used a similar schedule, but included additional questions examining what had happened to them following treatment, including changes over time in their opinions of treatment, their interactions with healthcare professionals, and their current health. Patient interviews were undertaken face-to-face or by telephone depending on patient preference.

Principal investigators and nurses responsible for administering and monitoring the trial drugs were sampled purposively from trial sites based on recruitment rates to the cohort and trial. They were approached by telephone or email, and gave informed consent. All interviews were semi-structured and undertaken by telephone.

All interviews were recorded and transcribed. Patient and professional data were analysed using schema and thematic analysis frameworks that were refined over time by researchers with expertise in qualitative data. Transcripts were coded to reveal major and minor themes and categories and were also schematised to disclose succinct, multi-disciplinary overviews of key issues arising.<sup>2-4</sup>

### Results – interviews with participants

Thirty-five interviews were undertaken with 20 participants, 15 of whom were interviewed on two occasions. The participants were split evenly between the infliximab and ciclosporin arms of the trial, and were representative of the main study population in all baseline characteristics. Three patients in each group had undergone a colectomy since entering the trial.

The main findings from the patient interviews were that:

- Participants who had received infliximab appreciated the positive outcome from this treatment.
- Those who received infliximab appeared to speak more positively about their treatment than those who received ciclosporin.
- The debilitating symptoms of ulcerative colitis impact not only on their own quality of life, but also on their relationship with family and friends.
- Many participants expressed their desire to return to a 'normal' quality of life and many of those who had a colectomy, whilst initially adamant that they did not wish to 'lose' their colon, found relief from surgery and felt they could move on with their lives.
- Patients came to terms with having to live with the ongoing unpredictability of symptoms and treatments yet they recognised that this unpredictability makes it particularly difficult for them and for the healthcare professionals treating them to manage their health.
- Ulcerative colitis is considered an embarrassing condition which makes it an isolating and awkward experience for patients due to its impact on life and work.
- Lack of visibility of either symptoms or outcomes, also affected patients' willingness to share knowledge of the disease with others.
- Surgery was feared, but once a colectomy had been undertaken, most participants experienced relief and recognised the health benefits.

- Participants wanted to know more about the cause of ulcerative colitis and its links with stress and diet, and would have welcomed greater information provision.
- Ready access to an Inflammatory Bowel Disease Specialist Nurse was suggested as particularly important for members of this patient group.

### **Results – interviews with professionals**

Twenty-three interviews were undertaken with 15 principal investigators, stratified by the number of patients recruited per site, and eight senior nurses from sites that recruited well to the trial.

The main findings that emerged from these interviews were that

- Healthcare professionals make judgements about the two drugs largely based on their own personal experience of prescribing or giving them to patients.
- The views of nurses are influenced by the drug therapy choices of their units, the method of administration, and perceptions of effectiveness and adverse side effects.
- A clear preference for infliximab amongst nurses was based predominantly on the ease of administration of a short infusion of infliximab, when compared with the continuous 24 hour infusion required for ciclosporin.
- Some doctors strongly favoured infliximab, wishing to see it as the drug of choice in view of its perceived ability to manage the many complex symptoms of the disease, ease of administration, fewer side effects, and greater effectiveness.
- Other doctors favoured ciclosporin, perceiving it as safe, effective and cheap.
- Most doctors were unsure which drug to use in the future, and were prepared to wait for further evidence of effectiveness and safety before fully making up their minds.
- Doctors questioned guidelines relating to prescribing these drugs, and the restrictions this placed on personal autonomy in delivering best patient care.

### **Discussion**

The number of subjects interviewed in this study was small, but they were representative of the trial participants and sites. The findings include a strong preference from nurses for infliximab, based largely on a dislike of the infusion requirements for ciclosporin. Although doctors were in equipoise with regard to the trial, most but not all of those interviewed wished to see infliximab as the recommended drug of choice in the future. Patients who received infliximab tended to speak more positively their treatment than those given ciclosporin, and those who required surgery were positive about colectomy, having been fearful pre-operatively. The very debilitating and embarrassing impact of the disease on health, work and social life was emphasised by many patients.

### **References**

1. Williams JG, Alam MF, Alrubaiy L, et al. Comparison Of iNfliximab and ciclosporin in STeroid Resistant Ulcerative Colitis: pragmatic randomised Trial and economic evaluation (CONSTRUCT). *Health Technol Assess* 2016; **in press**.
2. Rapport F. Summative Analysis: A Qualitative Method for Social Science and Health Research. *International Journal of Qualitative Methods* 2010; **9**(3): 270-90.
3. Rapport F, Iredale R, Jones W, et al. Decision aids for familial breast cancer: exploring women's views using focus groups. *Health Expect* 2006; **9**(3): 232-44.
4. Ryan GW, Bernard HR. Data analysis and management methods. In: Denzin NK, Lincoln US, eds. *Handbook of Qualitative Research*. 2nd ed. CA: Sage, Newbury Park, CA; 2000: 769-902.
